# Supplementary material for: Influence of Coding Variability in APP-Aβ Metabolism Genes in Sporadic Alzheimer’s Disease
Source: PLoS One. 2016 Jun 1;11(6):e0150079. doi: 10.1371/journal.pone.0150079 (PMC4889076; doi:10.1371/journal.pone.0150079)
Supplement: S2 Table — Aa, aminoacid; OR, odds ratio; CI, confidence interval. (XLSX) [file pone.0150079.s002.xlsx]

## Sheet: Tabelle1
GENE	TRANSCRIPT	POSITION	rs ID	nucleotide change	Aa change	SIFT	POLYPHEN	Mutation Taster	ExAC	carrier cases	total cases	carrier controls	total controls	P-Value	corrected P-Value	OR	OR 95% CI
ADAM9	NM_003816	chr8:38869207	rs61753672	c.G226A	p.E76K	tolerated	benign	polymorphism	0.00639	6	332	8	676	0.4071	1	1536	0.435- 5.09
ADAM9	NM_003816	chr8:38871509	rs146980702	c.G280A	p.V94I	tolerated	benign	disease-causing	0.002087	3	332	4	676	0.69	1	1531	0.223-9.107
ADAM9	NM_003816	chr8:38879190	rs113649109	c.C701T	p.A234V	deleterious	possibly damaging	polymorphism	0.01289	1	332	0	676	0.329	1	Inf	0.052- Inf
ADAM9	NM_003816	chr8:38880817	rs140082569	c.G887A	p.R296Q	tolerated	benign	disease-causing	0.001648	1	332	1	676	0.550	1	2037	0.025-160.10
ADAM9	NM_003816	chr8:38884212	rs201439643	c.T1013C	p.V338A	tolerated	possibly damaging	disease-causing	0.00006589	0	332	1	676	1	1	0	0- 79.31
ADAM9	NM_003816	chr8:38884222	rs143659261	c.T1023A	p.F341L	tolerated	possibly damaging	disease-causing	0.000008237	0	332	1	676	1	1	0	0- 79.31
ADAM9	NM_003816	chr8:38928906	NOVEL	c.A1681G	p.K561E	tolerated	possibly damaging	disease-causing	NA	0	332	1	676	1	1	0	0- 79.31
ADAM9	NM_003816	chr8:38959425	NOVEL	c.A2342G	p.K781R	tolerated	benign	polymorphism	NA	0	332	1	676	1	1	0	0- 79.31
ADAM10	NM_001110	chr15:58913676	rs199769865	c.A1505G	p.Q502R	tolerated	benign	polymorphism	NA	0	332	1	676	1	1	0	0-79.31
ADAM10	NM_001110	chr15:58920072	NOVEL	c.G1187A	p.G396E	tolerated	possibly damaging	disease-causing	NA	0	332	1	676	1	1	0	0-79.31
ADAM17	NM_003183	chr2:9630541	rs55796712	c.C2240T	p.S747L	tolerated	benign	polymorphism	0.01198	8	332	21	676	0.689	1	0.77	0.291-1.834
ADAM17	NM_003183	chr2:9633031	rs375942302	c.G2078A	p.C693Y	tolerated	benign	disease-causing	0.00008812	0	332	1	676	1	1	0	0- 79.31
ADAM17	NM_003183	chr2:9633092	rs61754177	c.G2017A	p.V673I	deleterious	probably damaging	disease-causing	0.009146	7	332	8	676	0.2745	1	1797	0.549-5.726
ADAM17	NM_003183	chr2:9667930	rs2230818	c.A604G	p.R202G	tolerated	benign	polymorphism	0.02041	1	332	0	676	0.3294	1	Inf	0.052- Inf
ADAM17	NM_003183	chr2:9683364	rs61754178	c.T148C	p.I50V	tolerated	benign	disease-causing	0.003696	2	332	11	676	0.24	1	0.366	0.039- 1.694
BACE1	NM_012104	chr11:117160347	RS539765	c.C1441T	p.C481R	tolerated	benign	polymorphism	0.0003	1	323	3	676	1	1	0.677	0.012- 8.480
BACE1	NM_012104	chr11:117160380	rs143544031	c.A1408C	p.M470L	tolerated	benign	disease-causing	0.0008401	1	323	4	676	1	1	0.507	0.010-5.158
BACE1	NM_012104	chr11:117161704	rs149860623	c.C1004G	p.T335S	tolerated	benign	disease-causing	0.00002472	1	332	0	676	0.329	1	Inf	0.052-Inf
BACE1	NM_012104	chr11:117165968	REPORTED, NO rs ID	c.C446T	p.P149L	deleterious	probably damaging	disease-causing	0.000008238	1	323	0	676	0.329	1	Inf	0.052-Inf
BACE1	NM_012104	chr11:117186340	REPORTED, NO rs ID	c.G172A	p.G58S	tolerated	benign	polymorphism	0.00001006	0	323	1	676	1	1	0	0-79.312
BACE2	NM_012105	chr21:42629139	rs371508139	c.G1189A	p.G397S	deleterious	probably damaging	disease-causing	0.00009063	1	332	0	676	0.3294	1	Inf	0.052- Inf
BACE2	NM_012105	chr21:42647300	REPORTED, NO rs ID	c.A1306T	p.I436F	deleterious	benign	polymorphism	0.000008239	0	332	1	676	1	1	0	0- 79.31
BACE2	NM_012105	chr21:42647372	rs149345353	c.G1378A	p.A460T	tolerated	benign	polymorphism	0.002792	2	323	10	676	0.355	1	0.403	0.042-1.911
BACE2	NM_012105	chr21:42647496	NOVEL	c.G1352A	p.R501H	NA	probably damaging	polymorphism	0.000008245	0	323	1	676	1	1	0	0- 79.31
NCSTN	NM_015331	chr1:160321139	rs200265412	c.A710T	p.Q237L	tolerated	possibly damaging	disease-causing	0.000008257	1	332	0	676	0.329	1	Inf	0.052- Inf
NCSTN	NM_015331	chr1:160321594	REPORTED, NO rs ID	c.G842A	p.R281Q	tolerated	benign	disease-causing	0.00009889	2	332	0	676	0.108	1	Inf	0.382- Inf
NCSTN	NM_015331	chr1:160322750	rs150081670	c.A1070G	p.E357G	tolerated	possibly damaging	disease-causing	0.00007417	0	332	1	676	1	1	0	0-79.31
NCSTN	NM_015331	chr1:160323977	rs143039637	c.A1249T	p.N417Y	deleterious	possibly damaging	polymorphism	0.002736	5	332	5	676	0.311	1	2..05	0.468-8.977
NCSTN	NM_015331	chr1:160324043	rs144264818	c.G1315A	p.V439I	tolerated	probably damaging	disease-causing	0.0000906	0	332	1	676	1	1	0	0-79.31
NCSTN	NM_015331	chr1:160325722	rs150328505	c.G1525A	p.D509N	tolerated	benign	polymorphism	0.0002722	0	332	2	676	1	1	0	0-10.84
PSENEN	NM_172341	chr19:36237681	rs201293694	c.T239C	p.I80T	tolerated	benign	polymorphism	NA	0	332	1	676	1	1	0	0-79.31
APH1B	NM_031301	chr15:63569902	rs117618017	c.C80T	p.T27I	tolerated	benign	polymorphism	0.09078	53	332	144	676	0.051	1	0.702	0.486- 1.003
APH1B	NM_031301	chr15:63594660	rs61751105	c.G472T	p.V158L	tolerated	benign	disease-causing	0.01097	5	332	9	676	0.782	1	1133	0.295- 3.80
APH1B	NM_031301	chr15:63597857	rs1047552	c.T528G	p.F176L	deleterious	benign	polymorphism	0.05766	18	332	51	676	0.233	1	0.702	0.379- 1.247
APH1B	NM_031301	chr15:63597913	rs202134615	c.G584T	p.R195L	tolerated	probably damaging	disease-causing	0.00004944	0	332	1	676	1	1	0	0-79.31
APH1B	NM_031301	chr15:63597969	rs142676640	c.C640T	p.R214C	deleterious	probably damaging	disease-causing	0.0002482	1	332	0	676	0.329	1	Inf	0.052- Inf
APLP1	NM_001024807	chr19:36362583	rs375567499	c.C607T	p.R203C	deleterious	probably damaging	disease-causing	0.00003296	0	332	1	676	1	1	0	0- 79.312
APLP1	NM_001024807	chr19:36362619	rs145389825	c.A643T	p.T215S	tolerated	probably damaging	disease-causing	0.00259	2	332	2	676	0.602	1	02..04	0.147- 28.27
APLP1	NM_001024807	chr19:36362860	REPORTED, NO rs ID	c.G772A	p.V258M	tolerated	probably damaging	polymorphism	0.000008251	0	332	1	676	1	1	0	0- 79.312
APLP1	NM_001024807	chr19:36365679	rs376367676	c.C1252T	p.R418C	deleterious	probably damaging	disease-causing	0.00005867	1	332	1	676	0.55	1	2037	0.0259-160.108
APLP1	NM_001024807	chr19:36365736	rs35358477	c.G1309A	p.V437M	deleterious	probably damaging	disease-causing	0.003488	2	332	7	676	0.725	1	0.577	0.058-3.056
APLP1	NM_001024807	chr19:36367509	rs35586905	c.C1435G	p.P479A	tolerated	benign	disease-causing	0.009423	10	332	7	676	0.679	1	1203	0.486- 2.820
APLP1	NM_001024807	chr19:36368668	NOVEL	c.C1493T	p.P498L	tolerated	benign	polymorphism		0	332	1	676	1	1	0	0- 79.312
APLP1	NM_001024807	chr19:36370111	rs148071646	c.G1849A	p.V617M	deleterious	probably damaging	disease-causing	0.0001913	1	332	2	676	1	1	1018	0.017-19.630
APBA1	NM_001163	chr9:72055946	rs375280475	c.G2267A	p.R756H	tolerated	probably damaging	disease-causing	0.000033	0	332	1	676	1	1	0	0-79.31
APBA1	NM_001163	chr9:72071342	rs143979575	c.A1609G	p.M537V	deleterious	benign	disease-causing	0.000298	1	332	1	676	0.55	1	2037	0.0259-160.108
APBA1	NM_001163	chr9:72131577	rs34788368	c.A550C	p.S184A	tolerated	benign	polymorphism	0.1335	38	332	89	676	0.48	1	0.852	0.552- 1.295
APBA1	NM_001163	chr9:72131675	NOVEL	c.A452C	p.H151P	tolerated	benign	disease-causing	NA	0	332	1	676	1	1	0	0- 79.31
LRRTM3	NM_178011	chr10:68687524	NOVEL	c.A850C	p.N284H	tolerated	probably damaging	disease-causing	NA	1	332	0	676	0.329	1	Inf	0.052- Inf
LRRTM3	NM_178011	chr10:68688019	rs139383106	c.A1345G	p.M449V	tolerated	benign	disease-causing	0.00207	4	332	6	676	0.737	1	1361	0.280- 5.786
LRRTM3	NM_178011	chr10:68857384	REPORTED, NO rs ID	c.G1576A	p.D526N	tolerated	probably damaging	disease-causing	0.000008259	0	332	1	676	1	1	0	0- 79.312
GPR3	NM_005281	chr1:27720382	rs138953484	c.C80G	p.A27G	tolerated	benign	polymorphism	0.0015	1	332	1	676	0.329	1	Inf	0.052- Inf
GPR3	NM_005281	chr1:27720414	REPORTED, NO rs ID	c.C112A	p.P38T	tolerated	benign	disease-causing	0.000008325	0	332	1	676	1	1	0	0-79.31
GPR3	NM_005281	chr1:27720478	REPORTED, NO rs ID	c.C176T	p.A59V	tolerated	probably damaging	disease-causing	0.00004148	1	332	0	676	0.329	1	Inf	0.0522- Inf
GPR3	NM_005281	chr1:27720504	REPORTED, NO rs ID	c.A202T	p.T68S	tolerated	possibly damaging	disease-causing	0.00001658	0	332	1	676	1	1	0	0-79.31
GPR3	NM_005281	chr1:27720814	NOVEL	c.C512G	p.P171R	deleterious	probably damaging	disease-causing	NA	0	332	1	676	1	1	0	0-79.31
GPR3	NM_005281	chr1:27720977	REPORTED, NO rs ID	c.G675T	p.Q225H	tolerated	benign	disease-causing	0.000008239	1	332	0	676	0.329	1	Inf	0.0522- Inf
GPR3	NM_005281	chr1:27721125	NOVEL	c.C823T	p.P275S	tolerated	probably damaging	disease-causing	NA	0	332	1	676	1	1	0	0-79.31
GPR3	NM_005281	chr1:27721233	rs145122693	c.G931C	p.V311L	tolerated	benign	polymorphism	0.00002472	0	332	1	676	1	1	0	0-79.31
GPR3	NM_005281	chr1:27721276	rs145491319	c.G974A	p.R325H	tolerated	benign	disease-causing	0.0002499	0	332	1	676	1	1	0	0-79.31
TTR	NM_000371	chr18:29171879	rs138657343	c.G14A	p.R5H	tolerated	benign	polymorphism	0.0001071	0	332	1	676	1	1	0	0- 79.07
TTR	NM_000371	chr18:29172865	rs1800458	c.G76A	p.G26S	tolerated	benign	polymorphism	0.04953	57	332	97	676	0.263	1	1236	0- 1.791
TTR	NM_000371	chr18:29172937	rs28933979	c.G148A	p.V50M	deleterious	probably damaging	disease-causing	0.0001483	0	332	1	676	1	1	0	0- 79.312
TTR	NM_000371	chr18:29178610	rs28933981	c.C416T	p.T139M	deleterious	probably damaging	disease-causing	0.001475	6	332	2	676	0.018	1	6..19	1.099- 63.091
SORL1	NM_003105	chr11:121323072	rs147575757	c.G32C	p.R11P	deleterious	benign	disease-causing	0.0002606	2	332	0	676	0.108	1	Inf	0.382- Inf
SORL1	NM_003105	chr11:121340744	NOVEL	c.T314C	p.M105T	deleterious	possibly damaging	disease-causing	NA	1	332	0	676	0.3294	1	Inf	0.052- Inf
SORL1	NM_003105	chr11:121348842	rs140888526	c.G418A	p.D140N	tolerated	probably damaging	disease-causing	0.0003629	0	332	1	676	1	1	0	0- 79.31
SORL1	NM_003105	chr11:121367627	rs117260922	c.G808A	p.E270K	deleterious	probably damaging	disease-causing	0.01468	16	332	18	676	0.0936	1	1849	0.869-3.90
SORL1	NM_003105	chr11:121384931	rs150609294	c.A1112C	p.N371T	deleterious	benign	disease-causing	0.001376	1	332	4	676	1	1	0.507	0.010-5.158
SORL1	NM_003105	chr11:121391401	rs377550239	c.G1247A	p.R416Q	deleterious	probably damaging	disease-causing	0.000008291	1	332	1	676	0.55	1	2037	0.0259-160.108
SORL1	NM_003105	chr11:121393329	REPORTED, NO rs ID	c.G1439C	p.R480P	deleterious	probably damaging	disease-causing	0.00001647	0	332	1	676	1	1	0	0-79.31
SORL1	NM_003105	chr11:121393684	rs2298813	c.G1582A	p.A528T	tolerated	possibly damaging	polymorphism	0.07219	38	332	63	676	0.315	1	1257	0.797-1.960
SORL1	NM_003105	chr11:121403252	rs140058505	c.A1676G	p.N559S	tolerated	benign	polymorphism	0.00002508	0	332	1	676	1	1	0	0-79.31
SORL1	NM_003105	chr11:121415993	rs138438079	c.T1906A	p.S636T	tolerated	probably damaging	disease-causing	0.0005933	1	332	0	676	0.3294	1	Inf	0.0522-Inf
SORL1	NM_003105	chr11:121420791	REPORTED, NO rs ID	c.C2174T	p.T725M	deleterious	possibly damaging	disease-causing	0.00004144	1	332	0	676	0.3294	1	Inf	0.052-Inf
SORL1	NM_003105	chr11:121421313	rs148430425	c.G2200A	p.D734N	deleterious	probably damaging	disease-causing	0.001131	1	332	0	676	0.329	1	Inf	0.052- Inf
SORL1	NM_003105	chr11:121421361	rs146438170	c.G2248A	p.V750I	tolerated	benign	polymorphism	0.0005061	1	332	2	676	1	1	1018	0.017-19.630
SORL1	NM_003105	chr11:121425939	rs377222446	c.A2483G	p.N828S	tolerated	benign	polymorphism	0.0001565	0	332	2	676	1	1	0	0- 10.84
SORL1	NM_003105	chr11:121437819	rs1699107	c.G3220C	p.E1074Q	tolerated	benign	polymorphism	0.0051	0	332	1	676	1	1	0	0- 79.31
SORL1	NM_003105	chr11:121440913	rs139794846	c.A3271G	p.I1091V	tolerated	benign	disease-causing	0.00003295	0	332	1	676	1	1	0	0-79.31
SORL1	NM_003105	chr11:121440937	rs146903951	c.T3295C	p.F1099L	tolerated	benign	polymorphism	0.008263	8	332	13	676	0.641	1	1258	0.447-3.315
SORL1	NM_003105	chr11:121444958	rs62617129	c.A3346G	p.I1116V	tolerated	benign	polymorphism	0.005116	5	332	6	676	0.356	1	1706	0.408- 6.765
SORL1	NM_003105	chr11:121454205	REPORTED, NO rs ID	c.C3619T	p.R1207X	deleterious	probably damaging	disease-causing	0.00000827	0	332	1	676	1	1	0	0-79.312
SORL1	NM_003105	chr11:121454284	REPORTED, NO rs ID	c.T3698G	p.V1233G	tolerated	benign	polymorphism	0.00002525	0	332	1	676	1	1	0	0-79.312
SORL1	NM_003105	chr11:121458843	rs201549653	c.C3929T	p.A1310V	tolerated	benign	polymorphism	0.0005275	2	332	3	676	0.666	1	1359	0.112-11.921
SORL1	NM_003105	chr11:121460806	rs148551848	c.G4136A	p.G1379D	deleterious	probably damaging	disease-causing	0.0001153	0	332	1	676	1	1	0	0- 79.312
SORL1	NM_003105	chr11:121460838	REPORTED, NO rs ID	c.A4168G	p.R1390G	tolerated	benign	polymorphism	0.000008238	0	332	1	676	1	1	0	0-79.312
SORL1	NM_003105	chr11:121461818	NOVEL	c.A4322G	p.Y1441C	tolerated	probably damaging	disease-causing	NA	1	332	0	676	0.329	1	Inf	0.0522- Inf
SORL1	NM_003105	chr11:121466337	rs140384365	c.G4375A	p.V1459I	tolerated	benign	polymorphism	0.0007497	0	332	1	676	1	1	0	0- 79.312
SORL1	NM_003105	chr11:121466363	NOVEL	c.A4401T	p.Q1467H	tolerated	benign	polymorphism	NA	0	332	1	676	1	1	0	0- 79.312
SORL1	NM_003105	chr11:121466431	rs376955109	c.G4469A	p.R1490H	tolerated	benign	disease-causing	0.00002519	0	332	1	676	1	1	0	0-79.312
SORL1	NM_003105	chr11:121466439	REPORTED, NO rs ID	c.G4477A	p.G1493S	deleterious	probably damaging	disease-causing	0.00006687	1	332	0	676	0.329	1	Inf	0.052- Inf
SORL1	NM_003105	chr11:121474988	rs199717181	c.G4606A	p.G1536S	deleterious	benign	disease-causing	0.0001649	0	332	2	676	1	1	0	0-10.843
SORL1	NM_003105	chr11:121475859	rs138580875	c.G4689C	p.W1563C	deleterious	probably damaging	disease-causing	0.0001487	0	332	1	676	1	1	0	0- 79.31
SORL1	NM_003105	chr11:121485599	rs62622819	c.T5439A	p.H1813Q	tolerated	benign	disease-causing	0.005371	10	332	13	676	0.271	1	1583	0.614-3.955
SORL1	NM_003105	chr11:121491782	rs1792120	c.A5899G	p.I1967V	tolerated	benign	polymorphism	0.0047	1	332	0	676	0.3294	1	Inf	0.052-Inf
SORL1	NM_003105	chr11:121495816	rs140327834	c.A6194T	p.D2065V	tolerated	probably damaging	disease-causing	0.002823	0	332	7	676	0.102	1	0	0-1.407
SORL1	NM_003105	chr11:121495911	rs74642146	c.G6289A	p.V2097I	tolerated	probably damaging	disease-causing	0.001203	1	332	2	676	1	1	1018	0.0172-19.630
SORL1	NM_003105	chr11:121498424	rs143536682	c.C6525G	p.S2175R	deleterious	probably damaging	disease-causing	0.0002066	0	332	1	676	1	1	0	0- 79.31
ECE1	NM_001397	chr1:21551744	REPORTED, NO rs ID	c.G1991A	p.R664Q.	deleterious	benign	disease-causing	0.00004975	1	332	0	676	0.3294	1	Inf	0.052- Inf
ECE1	NM_001397	chr1:21560114	rs373422349	c.G1559A	p.R520Q	tolerated	benign	disease-causing	0.00004127	0	332	1	676	1	1	0	0-79.31
ECE1	NM_001397	chr1:21563258	rs140735120	c.G1421A	p.R474Q	deleterious	possibly damaging	disease-causing	0.00004118	0	332	1	676	1	1	0	0-79.31
ECE1	NM_001397	chr1:21564631	rs141146885	c.G1376A	p.S459N	tolerated	benign	polymorphism	0.002999	2	332	7	676	0.725	1	0.577	0.0582- 3.056
ECE1	NM_001397	chr1:21573855	rs1076669	c.C974T	p.T325I	tolerated	benign	polymorphism	0.05547	44	332	104	676	0.395	1	0.84	0.560-1.244
ECE1	NM_001397	chr1:21585253	NOVEL	c.G686A	p.R229H	deleterious	probably damaging	disease-causing	NA	0	332	1	676	1	1	0	0- 79.31
ECE1	NM_001397	chr1:21605702	REPORTED, NO rs ID	c.G214A	p.G72S	tolerated	probably damaging	disease-causing	0.00005778	0	332	1	676	1	1	0	0-79.312
ECE1	NM_001397	chr1:21605750	rs199521200	c.T166G	p.L56V	tolerated	benign	disease-causing	0.0003468	0	332	4	676	0.308	1	0	0-3.083
ECE1	NM_001397	chr1:21605755	NOVEL	c.T161G	p.V54G	tolerated	possibly damaging	disease-causing	0.005535	1	332	0	676	0.3294	1	Inf	0.052- Inf
ECE1	NM_001397	chr1:21605761	rs376064396	c.G155A	p.R52Q	tolerated	benign	disease-causing	0.00003303	1	332	1	676	0.55	1	2037	0.0259-160.108
ECE2	NM_001100120	chr3:183994447	rs13063766	c.C218T	p.T73I	tolerated	benign	polymorphism	0.04434	24	332	35	676	0.2	1	1426	0.796-2.516
ECE2	NM_001100120	chr3:183995069	rs56132089	c.C647G	p.A216G	tolerated	probably damaging	disease-causing	0.0005849	1	332	1	676	0.55	1	2037	0.025-160.108
ECE2	NM_001100120	chr3:184001715	ss1307618646	c.G1313A	p.R438H	deleterious	possibly damaging	disease-causing	0.00003318	0	332	1	676	1	1	0	0-79.31
ECE2	NM_001100120	chr3:184002881	rs189893178	c.G1274A	p.R497H	tolerated	benign	polymorphism	0.00001659	0	332	1	676	1	1	0	0- 79.31
ECE2	NM_001100120	chr3:184005718	ss1307618741	c.C1711T	p.R571W	deleterious	probably damaging	disease-causing	0.000008261	1	332	0	676	0.329	1	Inf	0.052-Inf
ECE2	NM_001100120	chr3:184007242	rs369611477	c.C1746A	p.S582R	tolerated	benign	polymorphism	0.0001404	0	332	1	676	1	1	0	0-79.31
ECE2	NM_001100120	chr3:184008046	rs142884324	c.G1909A	p.E637K	tolerated	benign	disease-causing	0.0001535	1	332	2	676	0.55	1	2037	0.025- 160.108
ECE2	NM_001100120	chr3:184008878	rs149515968	c.T2239A	p.S747T	tolerated	probably damaging	disease-causing	0.00231	5	332	8	676	0.767	1	12763	0.325-4.465
ECE2	NM_001100120	chr3:184008995	rs202225237	c.G2356A	p.G786R	deleterious	probably damaging	disease-causing	0.00003374	0	332	1	676	1	1	0	0-79.31
ECE2	NM_001100120	chr3:184009928	REPORTED, NO rs ID	c.G2554A	p.V852M	deleterious	probably damaging	disease-causing	0.00008322	1	332	0	676	0.329	1	Inf	0.0522-Inf
IDE	NM_004969	chr10:94214218	NOVEL	c.A3043T	p.M1015L	tolerated	benign	disease-causing		1	332	0	676	0.329	1	Inf	0.0522- Inf
IDE	NM_004969	chr10:94223617	rs145451690	c.A2632G	p.T878A	tolerated	benign	disease-causing	0.0001071	0	332	1	676	1	1	0	0-79.31
IDE	NM_004969	chr10:94239177	NOVEL	c.C1741G	p.P581A	deleterious	benign	disease-causing		0	332	1	676	1	1	0	0-79.31
IDE	NM_004969	chr10:94267953	rs77824934	c.A1070G	p.N357S	tolerated	benign	disease-causing	0.00006597	1	332	0	676	0.329	1	Inf	0.0522- Inf
IDE	NM_004969	chr10:94297192	REPORTED, NO rs ID	c.G214A	p.G72S	tolerated	probably damaging	disease-causing	0.0000659	1	332	0	676	0.329	1	Inf	0.0522- Inf
CST3	NM_000099	chr20:23615971	NOVEL	c.G277T	p.E93X	deleterious	probably damaging	disease-causing	NA	1	332	0	676	1	1	0.677	0.0128-8.480
CST3	NM_000099	chr20:23615984	REPORTED, NO rs ID	c.C264A	p.Y88X	deleterious	probably damaging	disease-causing	0.000008499	0	332	1	676	1	1	0	0-79.31
CST3	NM_000099	chr20:23618327	NOVEL	c.G173T	p.G58V	tolerated	benign	polymorphism	NA	0	332	1	676	1	1	0	0-79.31
CST3	NM_000099	chr20:23618427	rs1064039	c.G73A	p.A25T	tolerated	unknown	polymorphism	0.2549	67	332	124	676	0.494	1	1125	0.794-1.585
CTSB	NM_001908	chr8:11702657	rs149786664	c.G997C	p.D333H	tolerated	benign	polymorphism	0.00004148	0	332	1	676	1	1	0	0-79.31
CTSB	NM_001908	chr8:11702705	rs79487342	c.G949A	p.D317N	tolerated	benign	disease-causing	0.002032	1	332	0	676	0.329	1	Inf	0.0522 Inf -
CTSB	NM_001908	chr8:11703251	rs145252189	c.C841T	p.R281C	deleterious	probably damaging	disease-causing	0.00002479	1	332	0	676	0.329	1	Inf	0.0522 Inf -
CTSB	NM_001908	chr8:11704617	rs114308907	c.A737C	p.N246T	deleterious	probably damaging	disease-causing	0.001936	3	332	1	676	0.107	1	6143	0.491-322.997
CTSB	NM_001908	chr8:11705192	REPORTED, NO rs ID	c.C672G	p.H224Q	deleterious	probably damaging	disease-causing	0.000008954	0	332	1	676	1	1	0	0-79.31
CTSB	NM_001908	chr8:11708421	rs148117767	c.C281T	p.P94L	deleterious	possibly damaging	disease-causing	0.0021	1	332	6	676	0.436	1	0.337	0.007- 2.800
CTSB	NM_001908	chr8:11708479	rs74996838	c.A223G	p.T75A	tolerated	benign	polymorphism	0.002601	1	332	0	676	0.329	1	Inf	0.0522 Inf -
CTSB	NM_001908	chr8:11708485	NOVEL	c.A217C	p.M73L	tolerated	benign	disease-causing	NA	0	332	1	676	1	1	0	0-79.31
CTSB	NM_001908	chr8:11710174	rs1803250	c.A157G	p.S53G	Deleterious	possibly damaging	polymorphism	0.09431	83	332	167	676	0.938	1	10159	0.739-1.389
CTSD	NM_001909	chr11:1775352	rs147278302	c.G844A	p.G282R	tolerated	benign	polymorphism	0.01011	5	332	9	676	0.782	1	1133	0.295-3.800
CTSD	NM_001909	chr11:1780815	rs141482597	c.G283A	p.V95I	tolerated	benign	disease-causing	0.00004173	0	332	1	676	1.	1	0	0-79.31
CTSD	NM_001909	chr11:1780832	NOVEL	c.C266T	p.P89L	deleterious	probably damaging	disease-causing	NA	1	332	0	676	0.329	1	Inf	0.0522- Inf
CTSD	NM_001909	chr11:1782594	rs17571	c.C173T	p.A58V	tolerated	benign	polymorphism	0.07041	49	332	103	676	0.925	1	0.963	0.651- 1.410
LYZ	NM_000239	chr12:69744014	rs1800973	c.C263A	p.T88N	deleterious	probably damaging	disease-causing	0.04275	45	332	108	676	0.35	1	0.824	0.552-1.215
LYZ	NM_000239	chr12:69744020	rs141911537	c.G269A	p.G90E	tolerated	possibly damaging	polymorphism	0.00003298	0	332	1	676	1	1	0	0- 79.31
MME	NM_000902	chr3:154801978	rs61762319	c.A22G	p.M8V	deleterious	benign	disease-causing	0.01644	13	332	35	676	0.433	1	0.746	0.357-1.470
MME	NM_000902	chr3:154834771	NOVEL	c.T650G	p.I217S	deleterious	probably damaging	disease-causing	NA	1	332	0	676	0.329	1	Inf	0.0522- Inf
MME	NM_000902	chr3:154856024	rs200961860	c.A854G	p.N285S	deleterious	benign	disease-causing	0.00001652	1	332	0	676	0.329	1	Inf	0.0522- Inf
MME	NM_000902	chr3:154857984	rs202094946	c.C860T	p.T287M	tolerated	probably damaging	disease-causing	0.00005897	0	332	1	676	1	1	0	0-79.31
MME	NM_000902	chr3:154859855	rs61758194	c.G1033A	p.V345I	tolerated	benign	disease-causing	0.002119	6	332	6	676	0.224	1	2053	0.544-7.746
MME	NM_000902	chr3:154859862	rs138218277	c.A1040G	p.Y347C	deleterious	benign	disease-causing	0.0004534	0	332	6	676	0.185	1	0	0- 1.725
MME	NM_000902	chr3:154886567	REPORTED, NO rs ID	c.G1961C	p.G654A	deleterious	probably damaging	disease-causing	0.000008294	0	332	1	676	1	1	0	0-79.31
ACE	NM_000789	chr17:61568577	rs3730043	c.C2747T	p.T916M	deleterious	probably damaging	disease-causing	0.004348	10	332	8	676	0.04566	1	2590	0.91-7.63
ACE	NM_000789	chr17:61557724	rs141543325	c.C682T	p.R228C	deleterious	probably damaging	disease-causing	0.0001569	0	332	1	676	1	1	0	0.0-79.3
ACE	NM_000789	chr17:61557773	rs3730025	c.A731G	p.Y244C	deleterious	probably damaging	disease-causing	0.01083	10	332	19	676	0.84	1	1073	0.44-2.46
ACE	NM_000789	chr17:61557840	rs121912704	c.C798G	p.Y266X	deleterious	probably damaging	disease-causing	0.00002472	0	332	1	676	1	1	0	0.0-79.3
ACE	NM_000789	chr17:61557841	rs149412997	c.G799A	p.G267R	Deleterious	probably damaging	disease-causing	0.0002966	0	332	1	676	1	1	0	0.0-79.3
ACE	NM_000789	chr17:61559033	rs2229839	c.C1052T	p.P351L	tolerated	possibly damaging	disease-causing	0.0002896	0	332	1	676	1	1	0	0.0-79.3
ACE	NM_000789	chr17:61559041	rs142350301	c.G1060A	p.G354R	deleterious	benign	disease-causing	0.007841	6	332	11	676	0.80	1	1112	0.33-3.31
ACE	NM_000789	chr17:61559850	rs150466411	c.C1142T	p.T381M	deleterious	probably damaging	disease-causing	0.0007558	1	332	0	676	0.329	1	inf	0.052- Inf
ACE	NM_000789	chr17:61560491	rs61758670	c.C1444T	p.R482C	tolerated	benign	polymorphism	0.0001648	0	332	2	676	1	1	0	0-10.8
ACE	NM_000789	chr17:61560501	rs28730839	c.C1454G	p.P485R	tolerated	possibly damaging	polymorphism	0.0004946	0	332	2	676	1	1	0	0-10.84
ACE	NM_000789	chr17:61560846	rs148943954	c.C1513G	p.P505A	deleterious	probably damaging	disease-causing	0.0004449	0	332	2	676	1	1	0	0-10.84
ACE	NM_000789	chr17:61561305	REPORTED, NO rs ID	c.G1682A	p.R561Q	tolerated	benign	disease-causing	0.00001698	1	332	0	676	0.329	1	Inf	0.052-Inf
ACE	NM_000789	chr17:61561867	rs201594771	c.A1886C	p.H629P	tolerated	benign	polymorphism	0.005055	1	332	0	676	1	1	0.50	0.01-5.15
ACE	NM_000789	chr17:61562654	rs61758679	c.C1979G	p.S660C	deleterious	possibly damaging	polymorphism	0.0009589	1	332	4	676	1	1	0.507	0.01-5.15
ACE	NM_000789	chr17:61564015	rs371010069	c.G2156A	p.R719Q	deleterious	probably damaging	disease-causing	0.0000165	0	332	1	676	1	1	0	0-79.3
ACE	NM_000789	chr17:61564420	rs145819052	c.T2291A	p.L764Q	Deleterious	benign	polymorphism	0.0002831	0	332	1	676	1	1	0	0-79.3
ACE	NM_000789	chr17:61564428	rs148995315	c.G2299A	p.E767K	deleterious	possibly damaging	disease-causing	0.0003083	2	332	0	676	0.108	1	Inf	0.38-Inf
ACE	NM_000789	chr17:61566095	rs117647476	c.A2392G	p.I798V	tolerated	benign	disease-causing	0.001985	3	332	5	676	0.723	1	1..22	0.18-6.33
ACE	NM_000789	chr17:61566435	NOVEL	c.C2583G	p.H861Q	deleterious	possibly damaging	disease-causing		0	332	1	676	1	1	0	0-79.312
ACE	NM_000789	chr17:61570921	ss1359207140	c.G3037A	p.G1013S	deleterious	probably damaging	disease-causing	0.00005772	1	332	1	676	0.55	1	2037	0.025-160.10
ACE	NM_000789	chr17:61570937	rs4976	c.T3053C	p.I1018T	deleterious	probably damaging	disease-causing	0.0004207	1	332	0	676	1	1	0	0-79.3
ACE	NM_000789	chr17:61570992	rs61754074	c.C3108A	p.N1036K	deleterious	benign	disease-causing	0.0007393	1	332	2	676	1	1	1018	0.017-19.63
ACE	NM_000789	chr17:61574501	rs372282664	c.G3695A	p.R1232H	tolerated	benign	polymorphism	0.00009584	0	332	2	676	1	1	0	0-10.84
ACE	NM_000789	chr17:61574642	rs200754517	c.G3836A	p.R1279Q	deleterious	benign	polymorphism	0.005664)	3	332	3	676	0.4018	1	2044	0.27- 15.35
ACE	NM_000789	chr17:61574656	rs375527470	c.C3850T	p.R1284C	deleterious	possibly damaging	polymorphism	0.00006676	0	332	1	676	1	1	0	0-79.312
MMP3	NM_000789	chr11:102709907	rs139072785	c.T1003C	p.S335P	deleterious	benign	polymorphism	0.0002144	0	332	2	676	1	1	0	0- 10.84
MMP3	NM_002422	chr11:102710924	rs369959225	c.C850A	p.P284T	tolerated	benign	disease-causing	0.00001649	1	332	0	676	0.329	1	Inf	0.052- Inf
MMP3	NM_002422	chr11:102711201	rs148047905	c.G749A	p.R250H	tolerated	benign	polymorphism	0.0004121	2	332	0	676	0.1083	1	Inf	0.382- Inf
MMP3	NM_002422	chr11:102711208	rs41357345	c.C742T	p.R248W	deleterious	possibly damaging	polymorphism	0.0004368	1	332	1	676	0.55	1	20377	0.0259-160.108
MMP3	NM_002422	chr11:102712951	rs140794544	c.C559T	p.P187S	deleterious	probably damaging	disease-causing	0.0005369	0	332	2	676	1	1	0	0-10.84
MMP3	NM_002422	chr11:102713181	rs139243180	c.G480T	p.M160I	deleterious	possibly damaging	disease-causing	0.000282	1	332	0	676	0.329	1	Inf	0.052- Inf
MMP3	NM_002422	chr11:102713204	rs148579119	c.T457C	p.Y153H	tolerated	benign	polymorphism	0.001311	2	332	2	676	0.602	1	2..04	0.147-28.270
MMP3	NM_002422	chr11:102713620	rs679620	c.A133G	p.K45E	tolerated	benign	polymorphism	0.4109	240	332	491	676	0.94	1	0.982	0.725- 1.335
A2M	NM_000014	chr12:9221373	NOVEL	c.T 4329G	p.1L443N	NA	NA	NA	NA	1	332	0	676	0.329	1	Inf	0.052-Inf
A2M	NM_000014	chr12:9222373	rs200486795	c.A4231C	p.S1411R	tolerated	benign	disease-causing	0.0001822	0	332	1	676	1	1	0	0-79.31
A2M	NM_000014	chr12:9225454	NOVEL	c.C3770T	p.A1257V	deleterious	probably damaging	disease-causing	NA	0	332	1	676	1	1	0	0-79.31
A2M	NM_000014	chr12:9229401	NOVEL	c.C3483G	p.D1161E	tolerated	benign	polymorphism	NA	0	332	1	676	1	1	0	0-79.31
A2M	NM_000014	chr12:9231867	rs202210880	c.G3092A	p.R1031Q	tolerated	benign	polymorphism	0.000628	1	332	1	676	0.55	1	2037	0.025- 160.108
A2M	NM_000014	chr12:9232268	rs669	c.A2998G	p.I1000V	tolerated	benign	polymorphism	0.3102	177	332	378	676	0.458	1	0.9	0.685-1.182
A2M	NM_000014	chr12:9232406	rs368831189	c.A2860G	p.I954V	deleterious	benign	polymorphism	0.00001937	0	332	2	676	1	1	0	0-10.84
A2M	NM_000014	chr12:9242502	NOVEL	c.T2714G	p.V905G	deleterious	probably damaging	disease-causing	NA	1	332	0	676	0.329	1	Inf	0.052- Inf
A2M	NM_000014	chr12:9243017	rs55761427	c.G2531A	p.A844V	tolerated	benign	polymorphism	0.01709	19	332	31	676	0.442	1	1262	0.662-2.348
A2M	NM_000014	chr12:9256849	REPORTED, NO rs ID	c.T1252C	p.S418P	tolerated	benign	polymorphism	0.000193	0	332	1	676	1	1	0	0-79.31
A2M	NM_000014	chr12:9256972	rs200364039	c.G1129A	p.V377I	tolerated	benign	polymorphism	0.0007558	0	332	1	676	1	1	0	0-79.31
A2M	NM_000014	chr12:9258863	rs112506934	c.A1073G	p.H358R	deleterious	benign	polymorphism	0.0002819	0	332	1	676	1	1	0	0-79.31
A2M	NM_000014	chr12:9260217	rs182493380	c.C782T	p.P261L	tolerated	benign	disease-causing	0.005831	0	332	1	676	1	1	0	0-79.31
A2M	NM_000014	chr12:9262592	rs377549857	c.C544A	p.Q182K	tolerated	benign	polymorphism	0.00001657	1	332	0	676	0.329	1	Inf	0.052- Inf
A2M	NM_000014	chr12:9268393	rs201671036	c.T53G	p.L18R	deleterious	benign	polymorphism	0.001565	4	332	3	676	0.226	1	2732	0.459-18.763
PLAT	NM_000930	chr8:42036464	rs61755432	c.G1481C	p.G494A	tolerated	probably damaging	disease-causing	0.0008079	0	332	3	676	0.554	1	0	0- 4.928
PLAT	NM_000930	chr8:42036570	rs62001885	c.T1375C	p.Y459H	deleterious	benign	disease-causing	0.00009926	1	332	0	676	0.329	1	Inf	0.0522- Inf
PLAT	NM_000930	chr8:42038165	rs151006962	c.C928T	p.R310C	deleterious	probably damaging	disease-causing	0.0007406	0	332	1	676	1	1	0	0- 79.312
PLAT	NM_000930	chr8:42039484	rs114878147	c.C860T	p.T287M	tolerated	benign	disease-causing	0.001883	2	332	4	676	0.602	1	2015-04-02	0.147-28.270
PLAT	NM_000930	chr8:42040300	NOVEL	c.A740G	p.K247R	tolerated	probably damaging	polymorphism	NA	0	332	1	676	1	1	0	0- 79.312
PLAT	NM_000930	chr8:42044965	rs2020921	c.C490T	p.R164W	deleterious	benign	disease-causing	0.000008365	16	332	30	676	0.751	1	1..09	0.546- 2.100
KLK6	NM_001012964	chr19:51462454	rs77760094	c.C701T	p.T234M	tolerated	possibly damaging	polymorphism	0.00002472	5	332	5	676	0.3116	1	2..05	0.468-8.977
KLK6	NM_001012964	chr19:51462482	NOVEL	c.G673A	p.G225R	deleterious	probably damaging	disease-causing	NA	0	332	1	676	1	1	0	0- 79.31
KLK6	NM_001012964	chr19:51462540	REPORTED, NO rs ID	c.C615A	p.D205E	deleterious	benign	polymorphism	0.00002475	0	332	1	676	1	1	0	0- 79.31
KLK6	NM_001012964	chr19:51471329	rs147992404	c.T32C	p.I11T	tolerated	benign	polymorphism	0.0008326	1	332	2	676	1	1	10181	0.0172-19.630
LRP1	NM_002332	chr12:57522754	NOVEL	c.A7C	p.T3P	tolerated	benign	polymorphism	0.00016	2	332	0	676	0.108	1	Inf	0.382- Inf
LRP1	NM_002332	chr12:57539082	rs1800127	c.C650T	p.A217V	tolerated	benign	polymorphism	0.01758	13	332	19	676	0.345	1	1408	0.630-3.050
LRP1	NM_002332	chr12:57539129	REPORTED, NO rs ID	c.A697G	p.M233V	tolerated	possibly damaging	disease-causing	0.00000825	0	332	1	676	1	1	0	0-79.31
LRP1	NM_002332	chr12:57550583	rs145095404	c.G1441A	p.D481N	tolerated	benign	disease-causing	0.00003423	0	332	1	676	1	1	0	0-79.31
LRP1	NM_002332	chr12:57550599	REPORTED, NO rs ID	c.C1457T	p.P486L	tolerated	possibly damaging	disease-causing	0.00001723	0	332	1	676	1	1	0	0-79.31
LRP1	NM_002332	chr12:57550649	rs199896480	c.A1507C	p.T503P	deleterious	probably damaging	disease-causing	NA	1	332	0	676	0.329	1	Inf	0.0522- Inf
LRP1	NM_002332	chr12:57556205	rs41291999	c.C2308T	p.R770W	deleterious	benign	polymorphism	0.001211	3	332	8	676	1	1	0.761	0.129- 3.199
LRP1	NM_002332	chr12:57556220	rs34714459	c.G2323C	p.A775P	tolerated	benign	polymorphism	0.003616	0	332	3	676	0.554	1	0	0-4.92
LRP1	NM_002332	chr12:57560713	NOVEL	c.C2798T	p.A933V	tolerated	probably damaging	disease-causing	NA	0	332	1	676	1	1	0	0-79.31
LRP1	NM_002332	chr12:57569339	rs35890409	c.G3644A	p.G1215E	deleterious	possibly_damaging	tolerated	0.003542	5	332	8	676	0.767	1	1276	0.325-4.465
LRP1	NM_002332	chr12:57571287	REPORTED, NO rs ID	c.C4274T	p.T1425I	tolerated	benign	polymorphism	0.00005047	1	332	0	676	0.329	1	Inf	0.0522- Inf
LRP1	NM_002332	chr12:57577915	rs141826184	c.C5977T	p.R1993W	deleterious	probably damaging	disease-causing	0.001834	2	332	4	676	1	1	1018	0.0916-7.145
LRP1	NM_002332	chr12:57578673	rs34577247	c.G6238A	p.D2080N	tolerated	benign	tolerated	0.02118	16	332	23	676	0.298	1	1437	0.698-2.886
LRP1	NM_002332	chr12:57578980	NOVEL	c.G6455A	p.R2152Q	tolerated	probably damaging	disease-causing	NA	1	332	0	676	0.329	1	Inf	0.052-Inf
LRP1	NM_002332	chr12:57584589	NOVEL	c.C7033T	p.L2345F	tolerated	possibly damaging	disease-causing	NA	0	332	1	676	1	1	0	0-79.31
LRP1	NM_002332	chr12:57585281	rs148875245	c.A7415G	p.N2472S	deleterious	benign	disease-causing	0.001142	1	332	2	676	1	1	1018	0.0172- 19.630
LRP1	NM_002332	chr12:57587039	rs113379328	c.G7636A	p.G2546S	deleterious	possibly_damaging	deleterious	0.003048	5	332	3	676	0.123	1	3425	0.661- 22.191
LRP1	NM_002332	chr12:57587696	NOVEL	c.G7819A	p.V2607M	tolerated	possibly damaging	polymorphism	NA	0	332	1	676	1	1	0	0-79.31
LRP1	NM_002332	chr12:57587773	rs149099223	c.C7896A	p.D2632E	tolerated	probably damaging	disease-causing	0.0005081	2	332	0	676	0.1083	1	Inf	0.382- Inf
LRP1	NM_002332	chr12:57588372	REPORTED, NO rs ID	c.C8081T	p.P2694L	tolerated	benign	tolerated	0.00003334	1	332	0	676	0.329	1	Inf	0.052- Inf
LRP1	NM_002332	chr12:57589676	rs143285614	c.G8591A	p.R2864H	tolerated	benign	disease-causing	0.0001904	2	332	0	676	0.108	1	Inf	0.382- Inf
LRP1	NM_002332	chr12:57590008	REPORTED, NO rs ID	c.G8840T	p.R2947L	tolerated	benign	tolerated	0.00001790	0	332	1	676	1	1	0	0-79.31
LRP1	NM_002332	chr12:57590871	rs368737311	c.A8999G	p.H3000R	tolerated	benign	polymorphism	0.00001648	0	332	1	676	1	1	0	0-79.31
LRP1	NM_002332	chr12:57590915	rs145303173	c.G9043A	p.G3015S	tolerated	benign	polymorphism	0.0007007	2	332	3	676	0.666	1	1359	0.112-11.921
LRP1	NM_002332	chr12:57591091	NOVEL	c.C9086T	p.P3029L	tolerated	probably damaging	disease-causing	NA	0	332	1	676	1	1	0	0-79.31
LRP1	NM_002332	chr12:57591424	rs2229279	c.C9259T	p.H3087Y	tolerated	benign	tolerated	0.002175	0	332	1	676	1	1	0	0-79.31
LRP1	NM_002332	chr12:57598512	rs151301245	c.G11174A	p.G3725E	tolerated	benign	tolerated	0.001489	0	332	1	676	1	1	1018	0.017-19.630
LRP1	NM_002332	chr12:57598975	ss1345170580	c.C11278T	p.R3760C	deleterious	probably damaging	disease-causing	0.000008282	1	332	0	676	1	1	0	0-79.31
LRP1	NM_002332	chr12:57599364	REPORTED, NO rs ID	c.G11494A	p.G3832S	tolerated	probably damaging	disease-causing	0.000008271	0	332	1	676	1	1	0	0- 79.31
LRP1	NM_002332	chr12:57599365	rs149488896	c.G11495C	p.G3832A	deleterious	benign	disease-causing	0.0005955	1	332	2	676	1	1	1018	0.017-19.630
LRP1	NM_002332	chr12:57600376	NOVEL	c.C11711T	p.A3904V	tolerated	probably damaging	disease-causing		0	332	1	676	1	1	0	0-79.31
LRP1	NM_002332	chr12:57600403	REPORTED, NO rs ID	c.G11738A	p.R3913H	tolerated	probably damaging	disease-causing	0.00002477	0	332	1	676	1	1	0	0-79.31
LRP1	NM_002332	chr12:57600505	rs145784157	c.G11840A	p.R3947Q	tolerated	benign	polymorphism	0.0002411	0	332	3	676	0.554	1	0	0- 4.928
LRP1	NM_002332	chr12:57601891	rs142650905	c.C11930T	p.S3977L	tolerated	probably_damaging	disease-causing		0	332	1	676	1	1	0	0-79.31
LRP1	NM_002332	chr12:57602950	rs142667784	c.C12230G	p.T4077R	tolerated	probably_damaging	probably_damaging	0.0002979	0	332	1	676	1	1	1018	0.017-19.630
LRP1	NM_002332	chr12:57603920	rs147724632	c.T12548G	p.V4183G	tolerated	benign	disease-causing	0.0009271	0	332	1	676	1	1	0	0-79.31
LRP1	NM_002332	chr12:57605027	ss1345170777	c.C12985T	p.R4329C	tolerated	possibly damaging	disease-causing	0	0	332	1	676	1	1	0	0-79.31
LRP1	NM_002332	chr12:57605313	rs148215878	c.G13135A	p.G4379S	tolerated	benign	polymorphism	0.0008117	1	332	0	676	0.329	1	Inf	0.052- Inf
LRP1	NM_002332	chr12:57606021	rs142605462	c.G13471C	p.D4491H	tolerated	probably damaging	disease-causing	0.0005242	3	332	1	676	0.107	1	6143	0.491-322.997
MEP1B	NM_005925	chr18:29782953	rs71361372	c.A348G	p.I116M	deleterious	probably damaging	disease-causing	0.01546	12	332	17	676	0.323	1	1453	0.625-3.273
MEP1B	NM_005925	chr18:29784281	ss1360590635	c.C505T	p.R169W	tolerated	benign	disease-causing	0.0001425	0	332	1	676	1	1	0	0-79.31
MEP1B	NM_005925	chr18:29787338	rs373648256	c.T671C	p.I224T	deleterious	probably damaging	disease-causing	0.00007271	0	332	1	676	1	1	0	0-79.31
MEP1B	NM_005925	chr18:29793100	rs113156575	c.A1157G	p.Q386R	tolerated	possibly damaging	disease-causing	0.0009369	1	332	0	676	0.329	1	Inf	0.052-Inf
MEP1B	NM_005925	chr18:29793346	rs141050716	c.C1403T	p.A468V	tolerated	benign	polymorphism	0.01038	6	332	15	676	0.816	1	0.811	0.255- 2.237
MEP1B	NM_005925	chr18:29795101	rs233223	c.C1636T	p.P546S	tolerated	benign	polymorphism	0.23	183	332	352	676	0.382	1	01..13	0.8610-1.485
MEP1B	NM_005925	chr18:29796959	REPORTED, NO rs ID	c.T1765A	p.S589T	tolerated	benign	disease-causing	0.000008288	1	332	0	676	0.329	1	Inf	0.052-Inf
MEP1B	NM_005925	chr18:29796983	NOVEL	c.C1789T	p.Q597X	deleterious	probably damaging	disease-causing	NA	0	332	1	676	1	1	0	0-79.31
MEP1B	NM_005925	chr18:29797921	rs616114	c.C2084T	p.P695L	tolerated	benign	polymorphism	0.371	222	332	443	676	0.723	1	1061	0.796- 1.417
S2 Table. Coding variants detected in APP-Aß metabolism genes in our study. Aa, amino acid; OR, odds ratio; CI, confidence interval.
