# Supplementary material for: Influence of Coding Variability in APP-Aβ Metabolism Genes in Sporadic Alzheimer’s Disease
Source: PLoS One. 2016 Jun 1;11(6):e0150079. doi: 10.1371/journal.pone.0150079 (PMC4889076; doi:10.1371/journal.pone.0150079)
Supplement: S3 Table — (XLSX) [file pone.0150079.s003.xlsx]

## Sheet: Tabelle1
GENE	TRANSCRIPT ID	TOTAL VARIANTS DETECTED IN THE STUDY COHORT	RELATIVE FREQUENCY OF VARIANTS DETECTED	TOTAL VARIANTS DETECTED IN EVS	RELATIVE FREQUENCY OF VARIANTS DETECTED (x/4300 European American)
A2M	NM_000014	26	0.0257937	149	0.0346512
ACE	NM_000789	45	0.0446429	252	0.0586047
ADAM10	NM_001110	26	0.0257937	58	0.0134884
ADAM17	NM_003183	18	0.0178571	90	0.0209302
ADAM9	NM_003816	23	0.0228175	84	0.0195349
APBA1	NM_001163	41	0.0406746	94	0.0218605
APH1B	NM_031301	39	0.0386905	33	0.00767442
APLP1	NM_001024807	22	0.0218254	106	0.0246512
BACE1	NM_012104	39	0.0386905	48	0.0111628
BACE2	NM_138991	88	0.0873016	75	0.0174419
CST3	NM_000099	12	0.0119048	16	0.00372093
CTSB	NM_001908	75	0.0744048	118	0.0274419
CTSD	NM_001909	20	0.0198413	95	0.022093
ECE1	NM_001397	51	0.0505952	102	0.0237209
ECE2	NM_014693	32	0.031746	142	0.0330233
GPR3	NM_005281	17	0.0168651	21	0.00488372
IDE	NM_004969	31	0.030754	98	0.0227907
KLK6	NM_001012964	11	0.0109127	31	0.0072
LRP1	NM_002332	111	0.110119	558	0.129
LRRTM3	NM_178011	29	0.0287698	33	0.0076
LYZ	NM_000239	5	0.00496032	16	0.0037
MEP1B	NM_005925	19	0.0188492	92	0.022
MME	NM_000902	40	0.0396825	102	0.023
MMP3	NM_002422	16	0.015873	74	0.0172093
NCSTN	NM_015331	21	0.0208333	88	0.0204651
PLAT	NM_000930	24	0.0238095	91	0.0211628
PSENEN	NM_172341	2	0.00198413	8	0.00186047
SORL1	NM_003105	88	0.0873016	287	0.0667442
TTR	NM_000371	6	0.00595238	22	0.00511628
S3 Table. Comparison between total variants and relative frequency of variants detected in our study and Exome Variant Server database (EVS) in the European-American cohort.
